# Supplementary material
Source: ML conference proceedings conference paper supplement (https://openreview.net/forum?id=QeWibaTmnn)

The order is from left to right for each row.

Hand over the binoculars by using all five fingers to securely grip the objective lens.

To hold a camera, use your thumb and forefinger for the body.

To use a camera effectively, grip the camera grip and control panel with your thumb and forefinger, while the camera body is held by other finger.,

Hold the cylinder bottle firmly with all fingers gripping its body.

Lift up the cylinder bottle by using fingers to grasp it.

To use a hammer, grasp it with all five fingers to secure the hammer grip.

Lift up the trigger sprayer by ensuring all five fingers grasp the bottle body.

To use a trigger sprayer, press the trigger with your forefinger and hold the bottle with your other fingers.

To use a flashlight, grip the handle using all five fingers for stability.

To lift up a teapot, use your fingers to grasp the teapot handle.

To use a game controller, gently place thumb on the controller panel and others to support.

To use a knife, firmly grasp the knife handle with all five fingers.

To use a phone, place all five fingers on the phone for better grip and control.

To use a pen, hold it between your thumb and index finger to write.

To use a mug, hold it with your fingers on the handle.

To use a screwdriver, grip the handle with all five fingers for stability.

To use a lotion pump, place your forefinger on the pump head and the other fingers on the bottle body.

Lift up the eyeglasses using all four fingers to grasp the lens and bridge.

Hand over the flashlight by grasping the handle with three fingers.

Hold the lotion pump with all five fingers in contact with the bottle body.

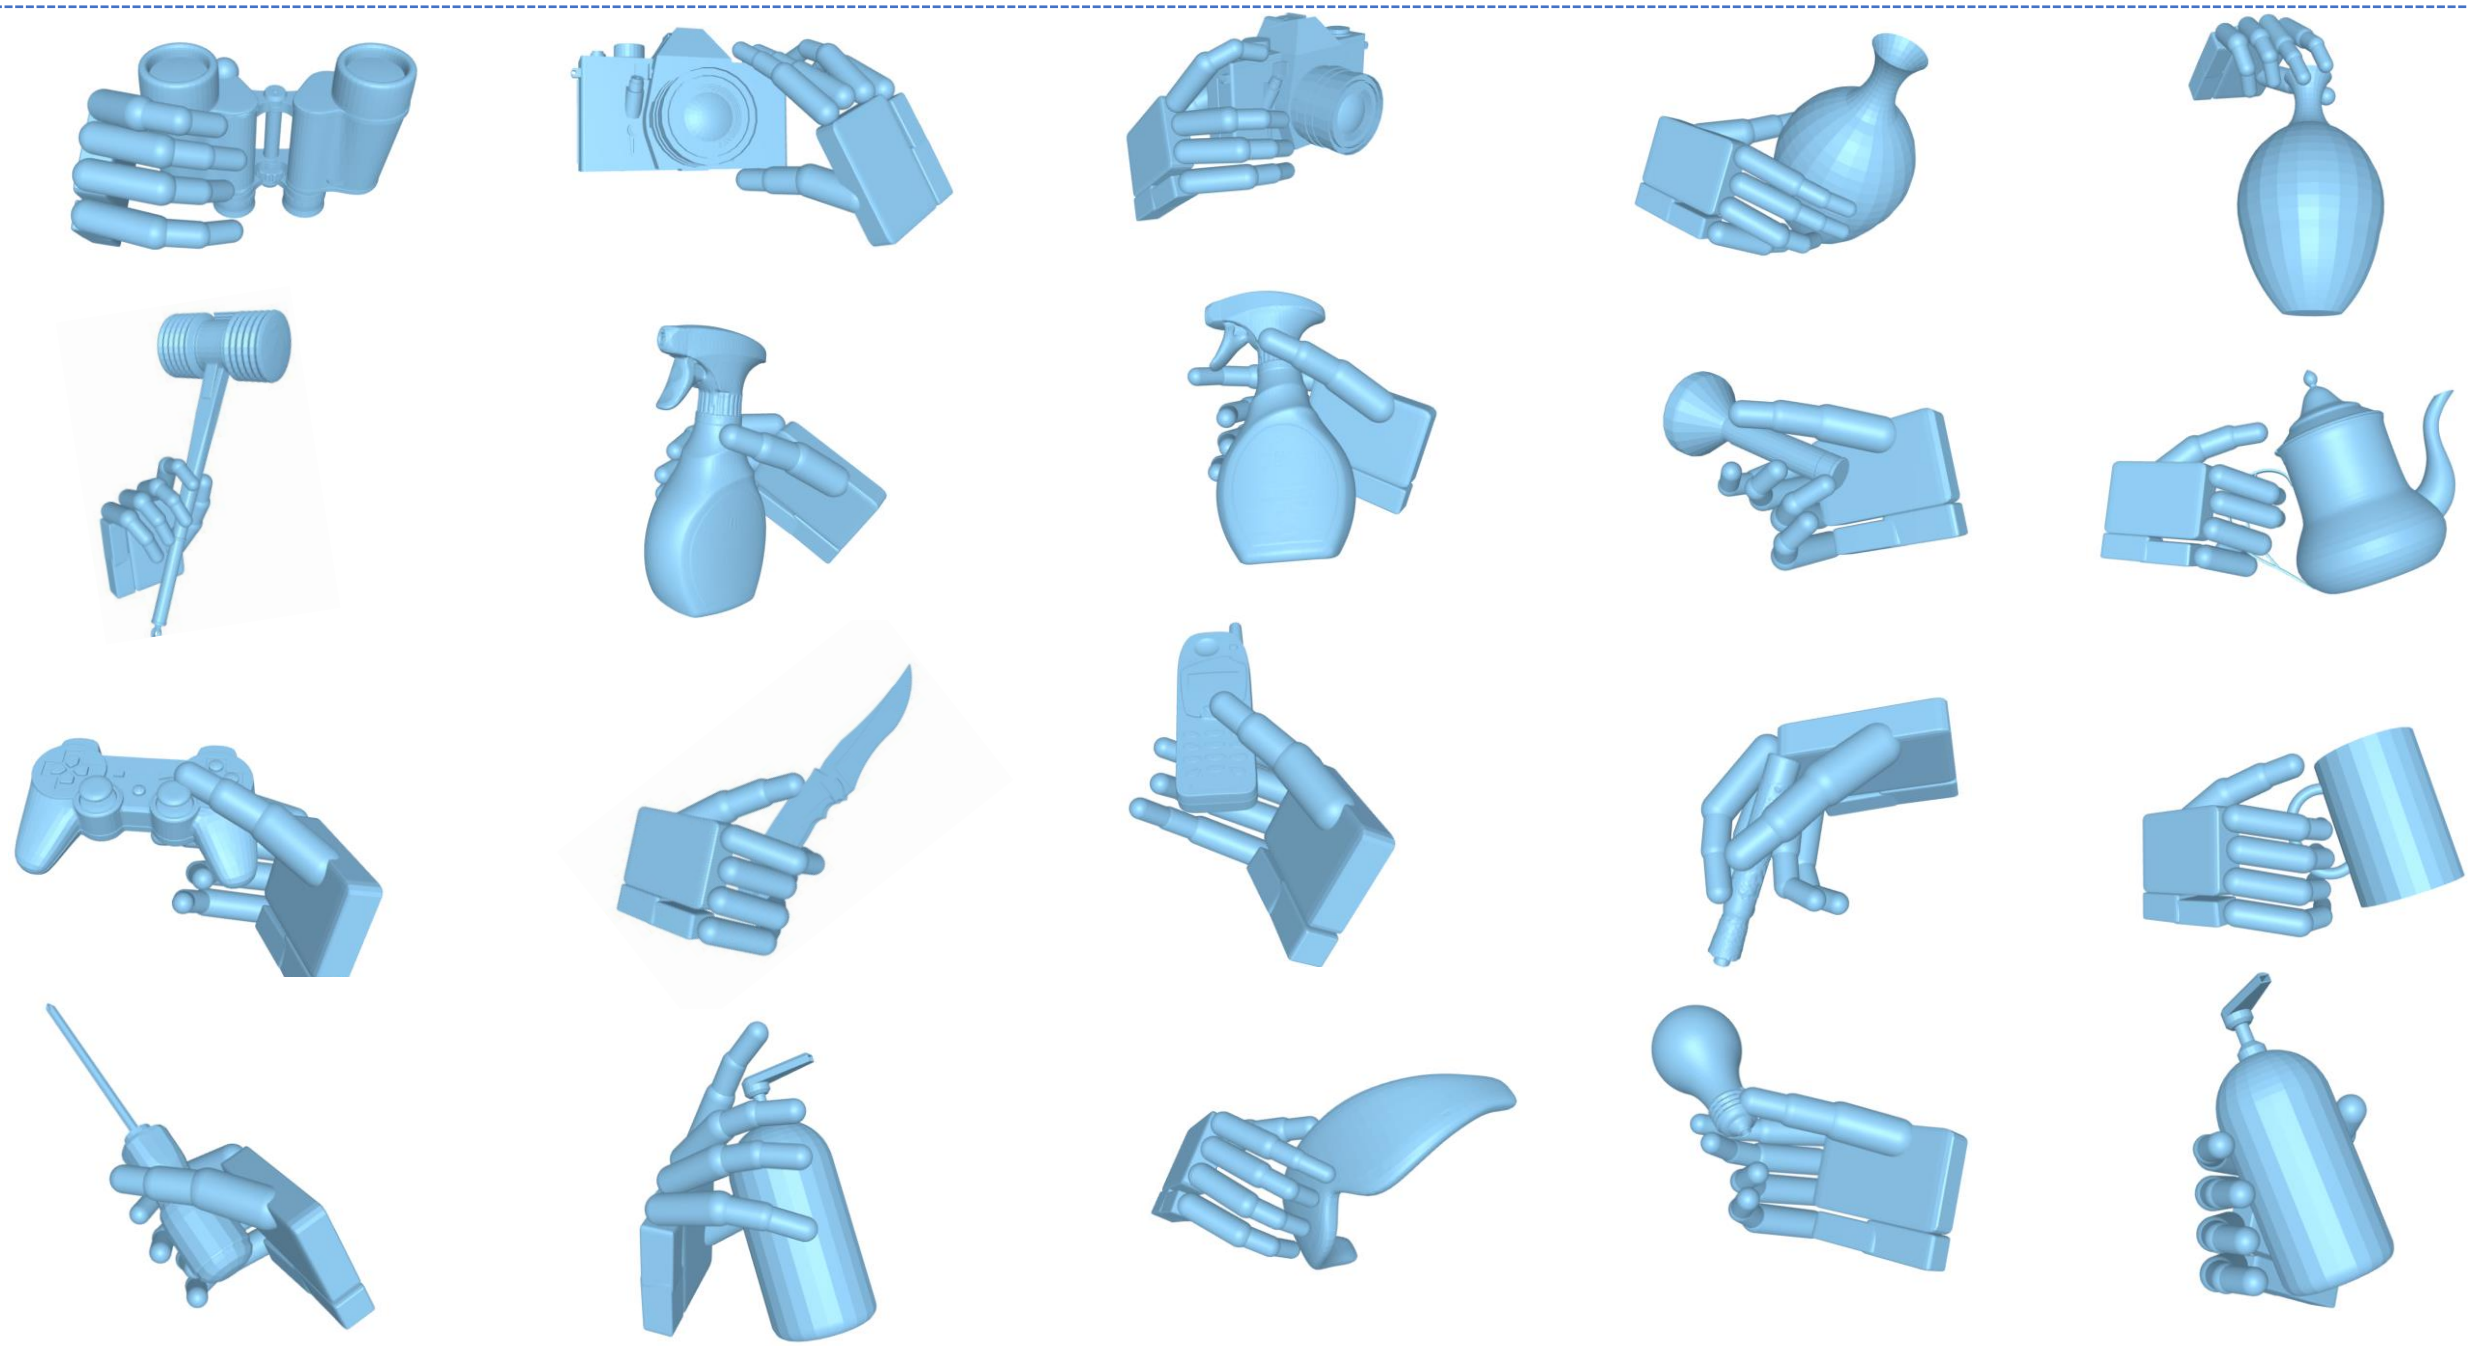

Supplement: supplementary_material [file attachment]
